# Supplementary material for: Affinity-seq detects genome-wide PRDM9 binding sites and reveals the impact of prior chromatin modifications on mammalian recombination hotspot usage
Source: Epigenetics Chromatin. 2015 Sep 7;8:31. doi: 10.1186/s13072-015-0024-6 (PMC4562113; doi:10.1186/s13072-015-0024-6)

**Additional file 6:**

**Figure S6. Closed chromatin marks, hotspot-deficient regions and recombination cold spots along individual mouse chromosomes.** Top to bottom in each chromosome – H3K9me3 enriched (up) or depleted (down) regions; H3K9me2 enriched and depleted regions; regions containing Affinity-seq *in vivo* binding sites in dispersed regions identified by Rscan are represented as red rectangles; regions containing recombination cold spots in Collaborative Cross mice [32] – red rectangles; fifth panel, alignability track from UCSC browser showing assembly gaps and low mappability regions.

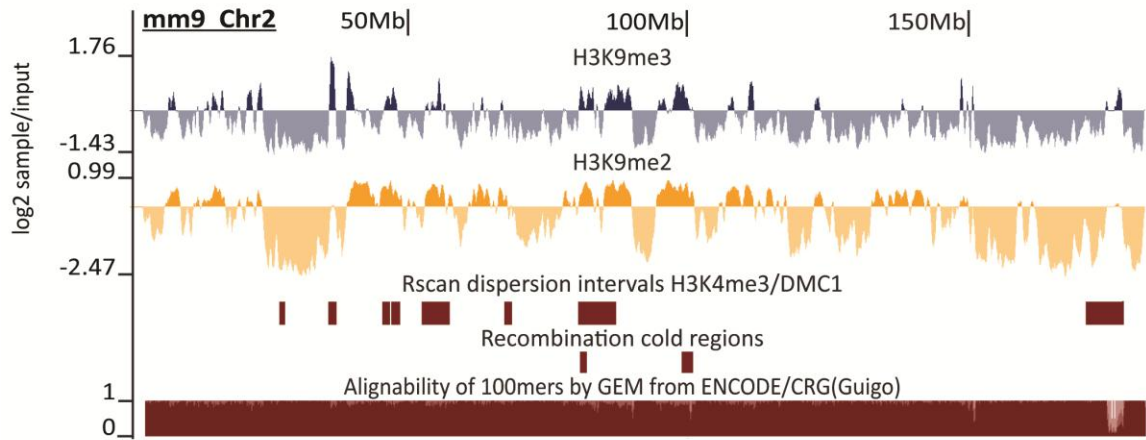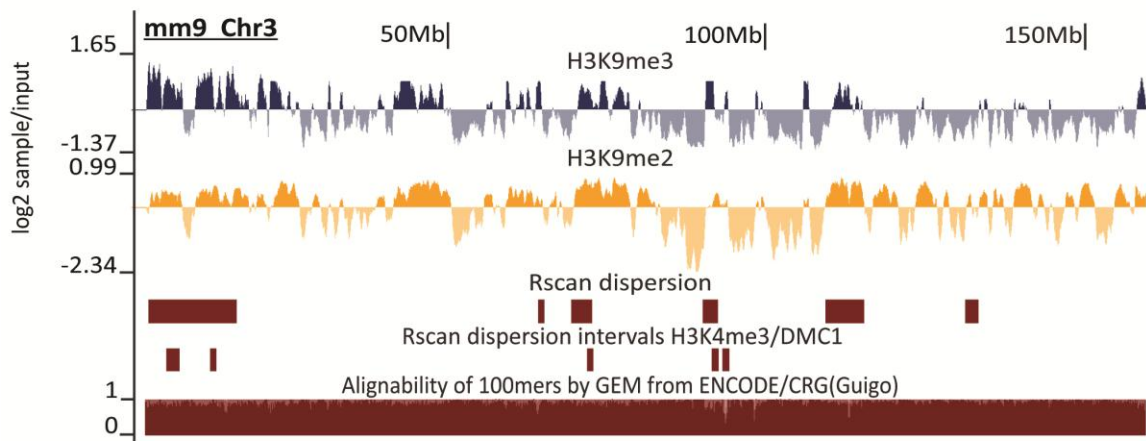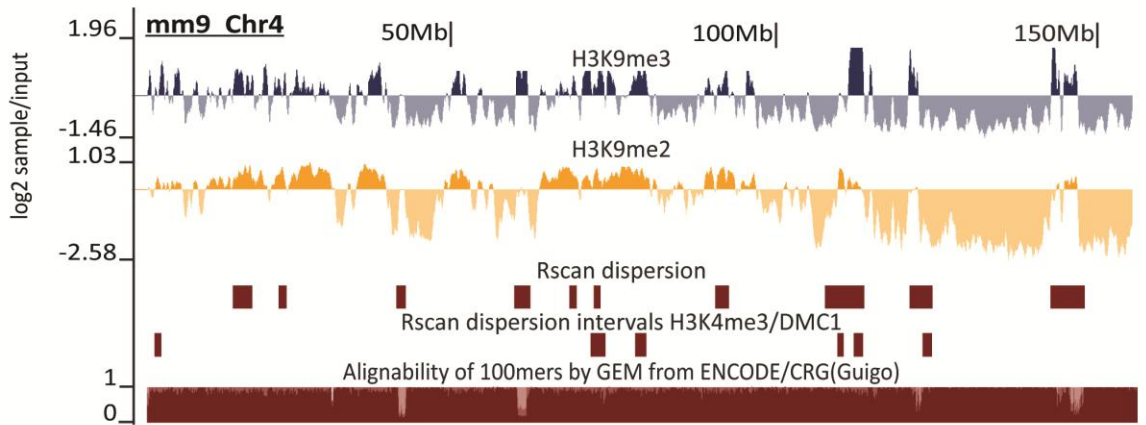

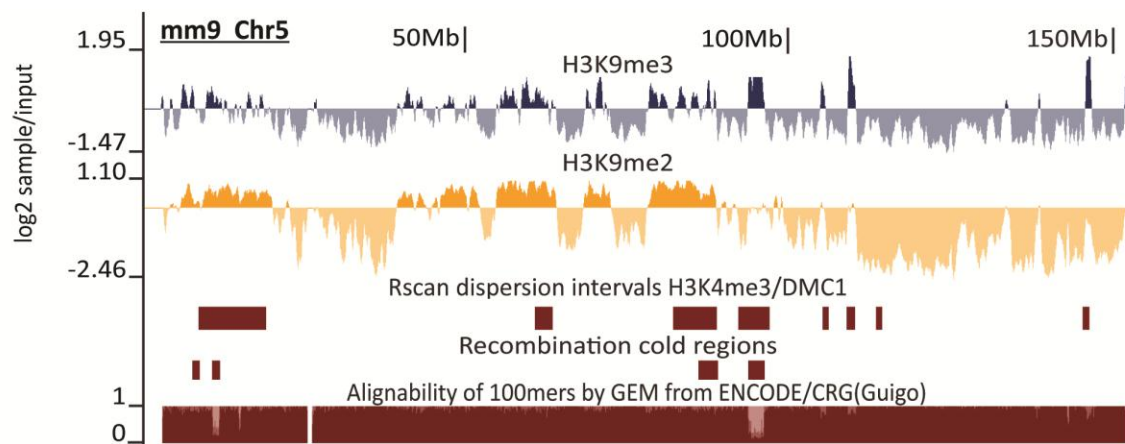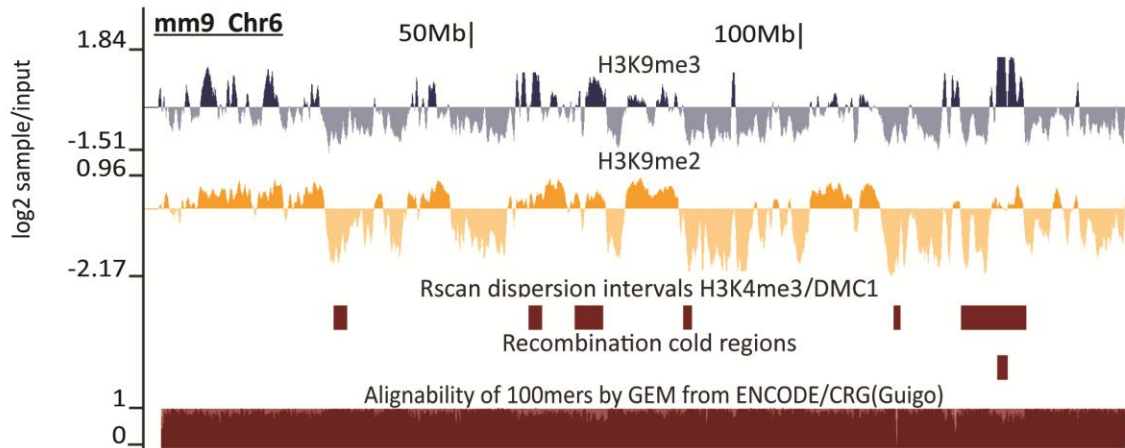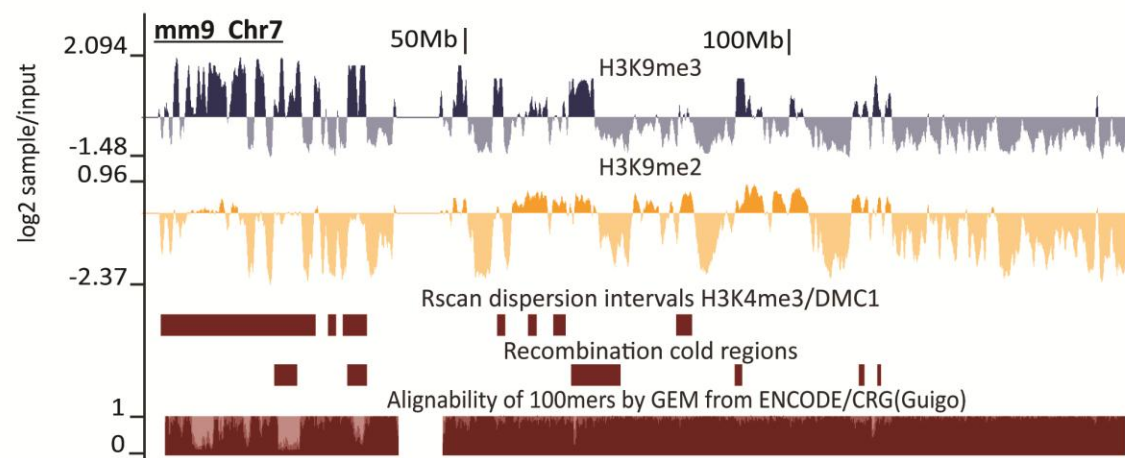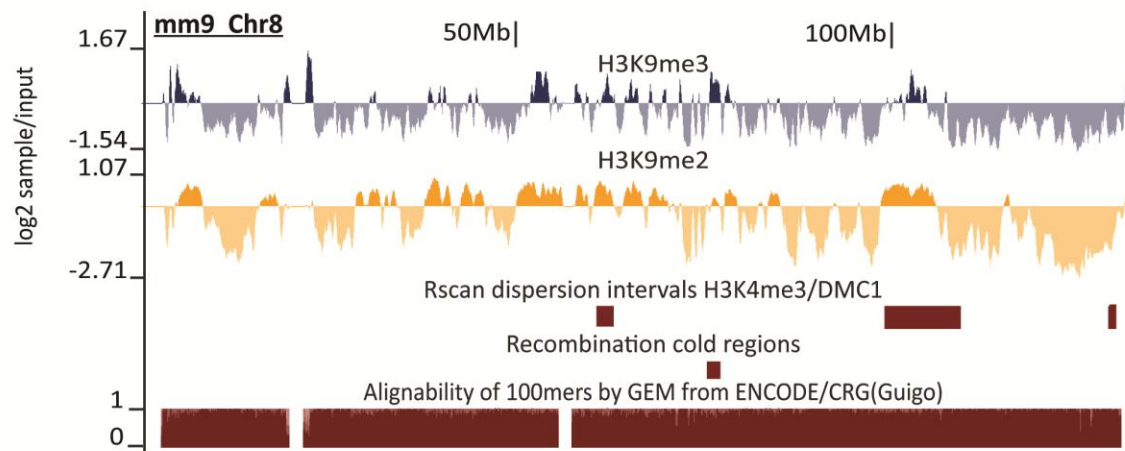

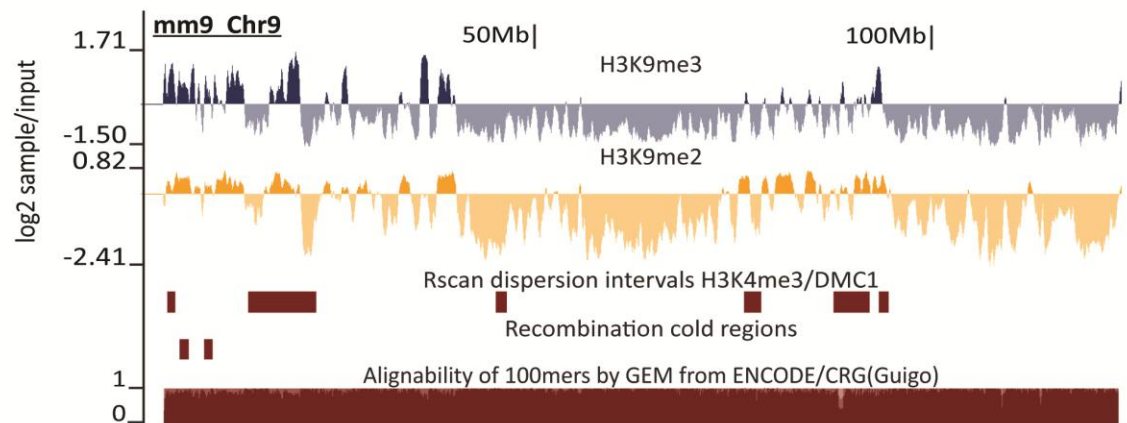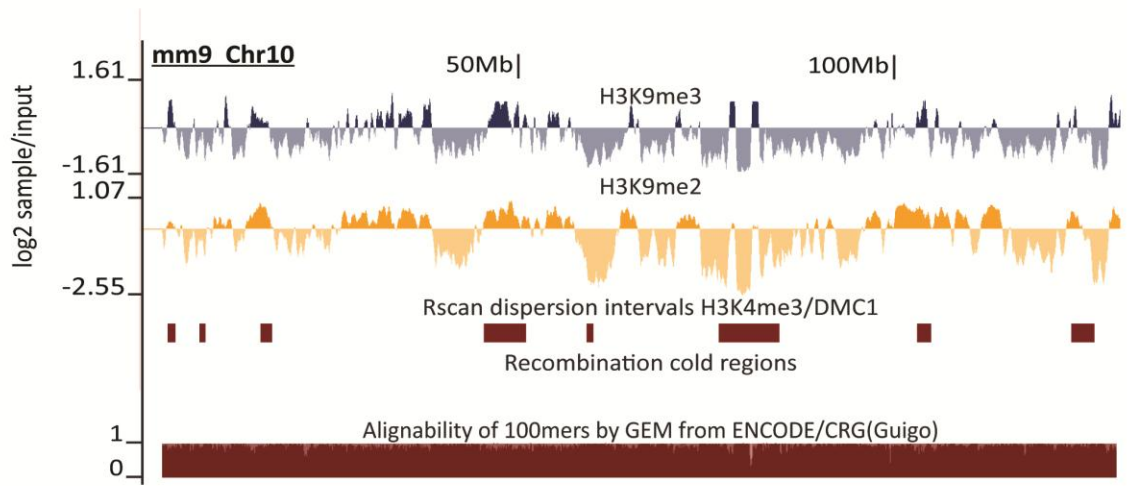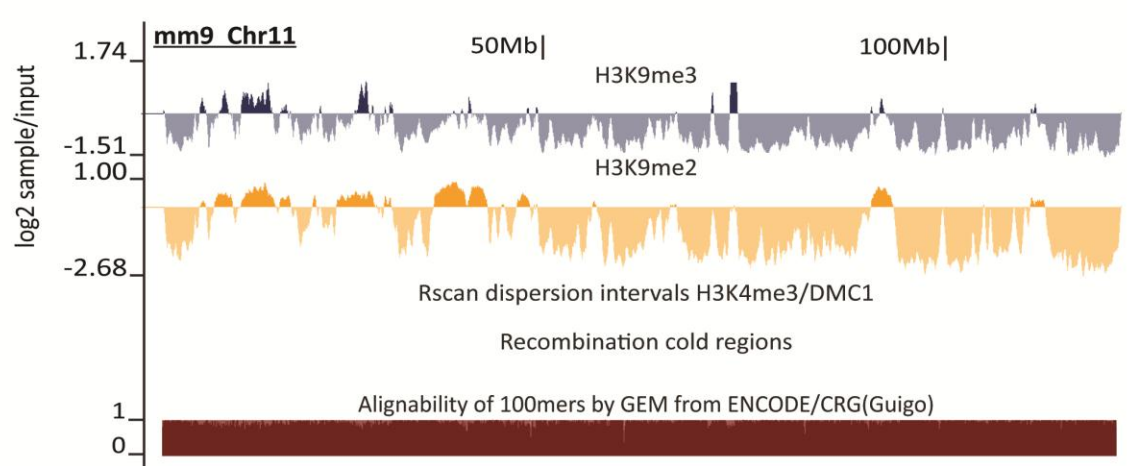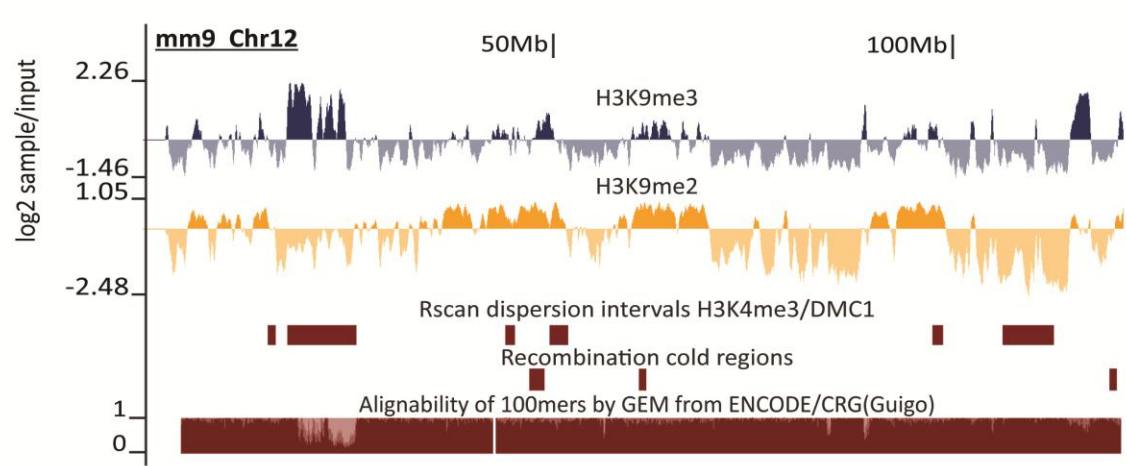

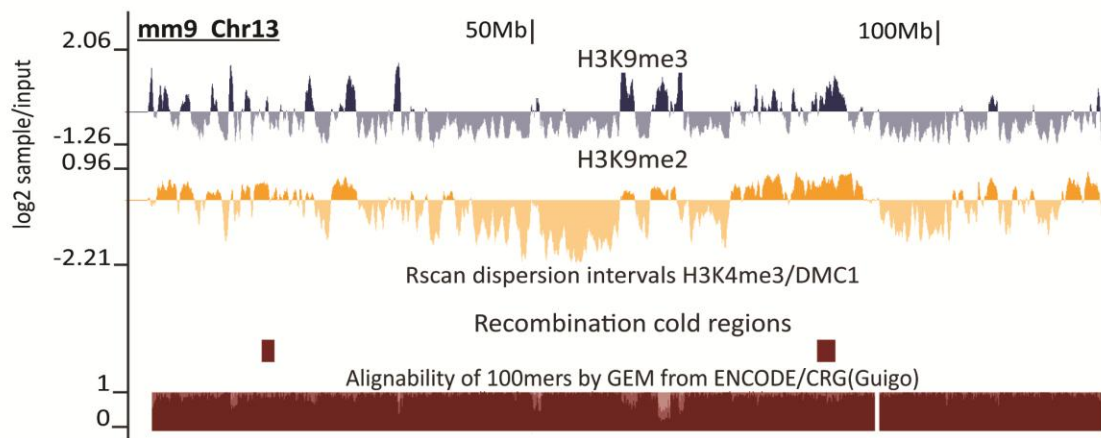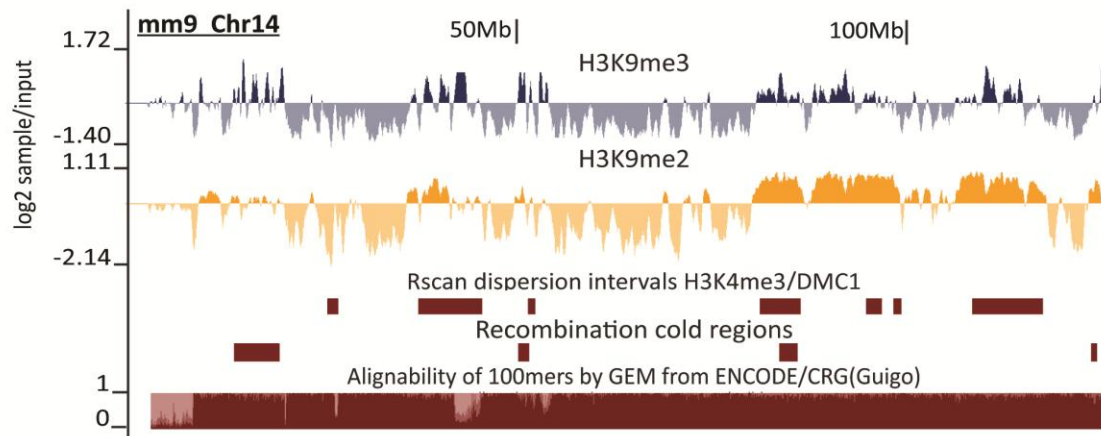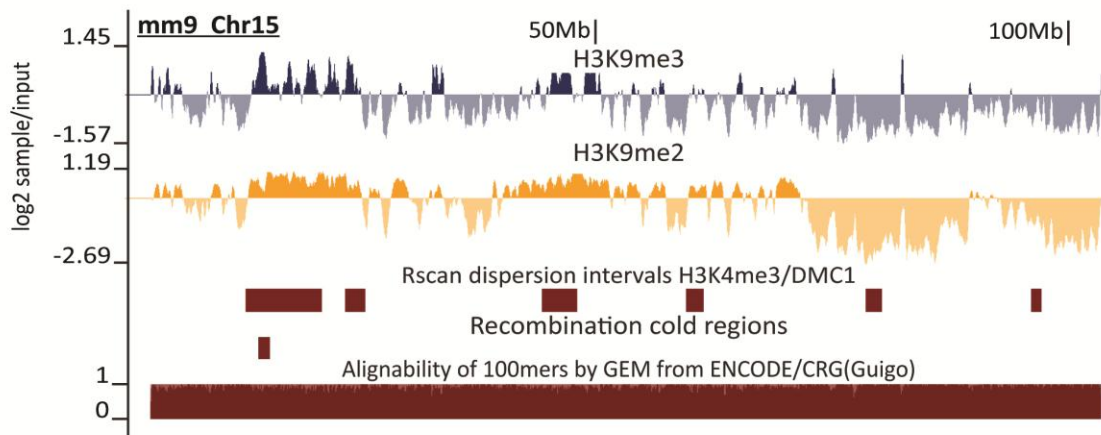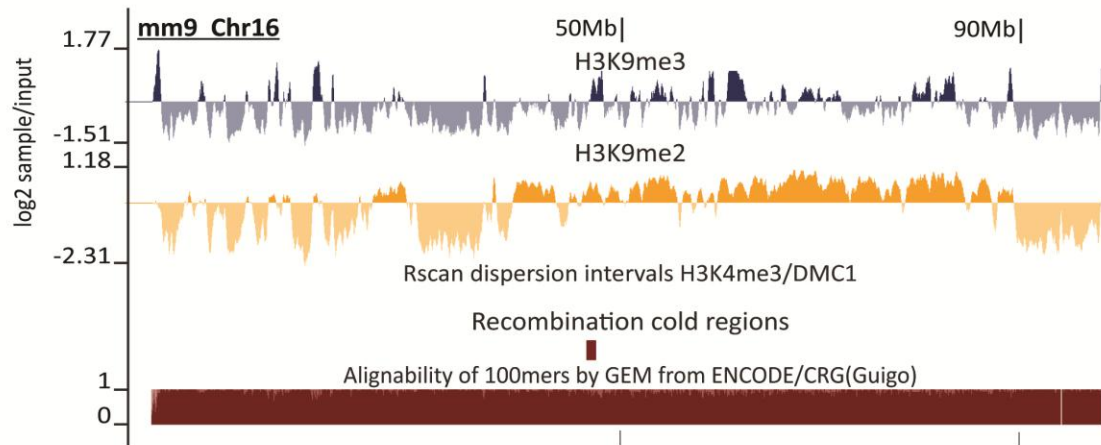

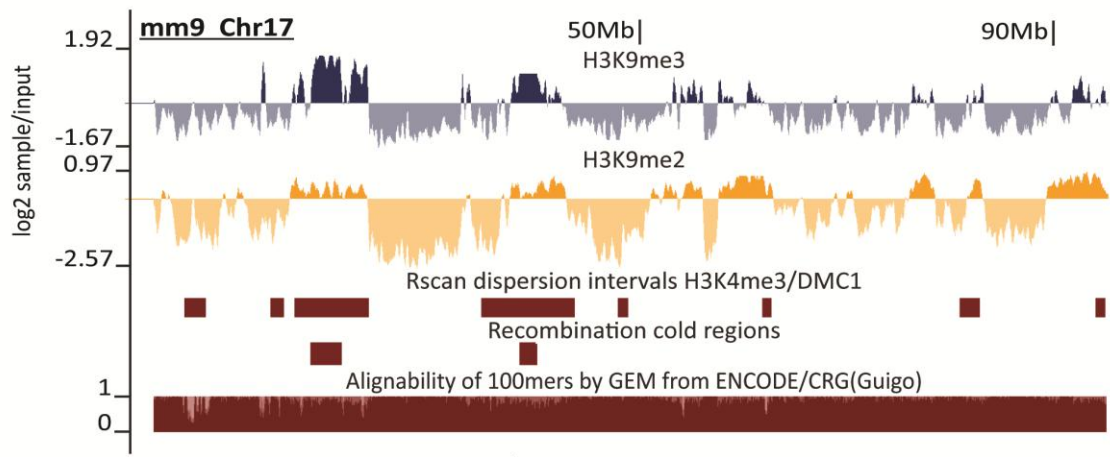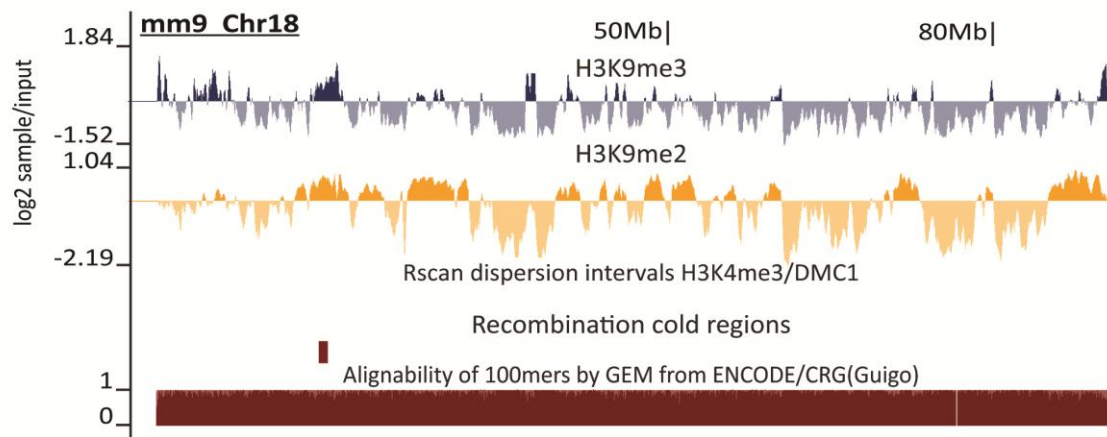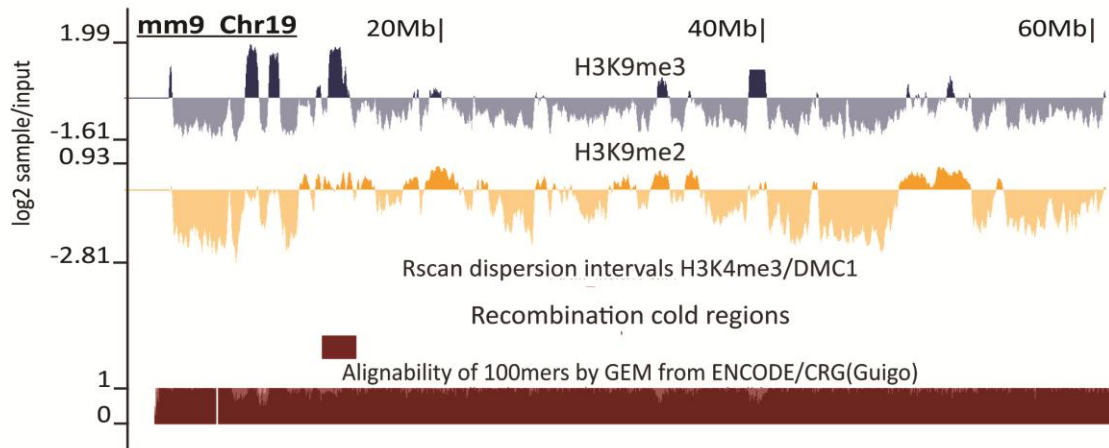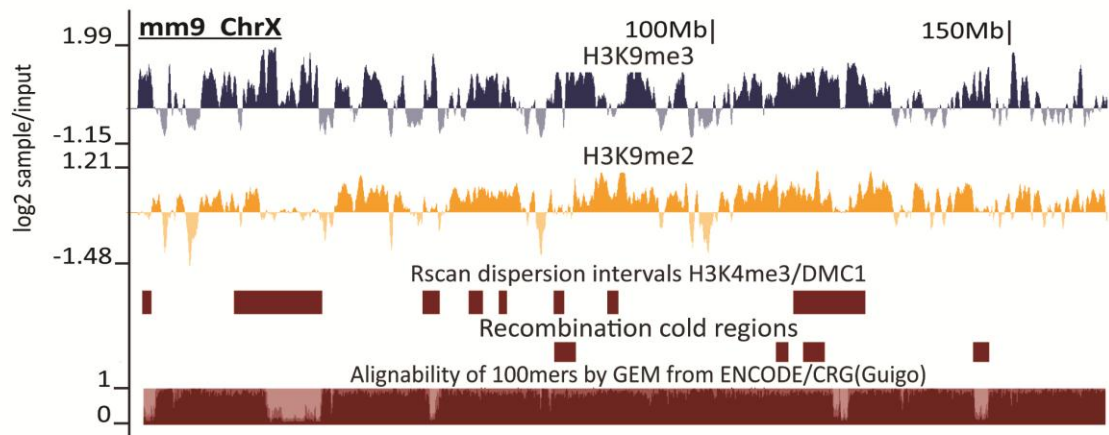

Supplement: Additional file 6: — Figure S6. Closed chromatin marks, hotspot-deficient regions and recombination cold spots along individual mouse chromosomes. [file 13072_2015_24_MOESM6_ESM.pdf]
