# Supplementary material for: Affinity-seq detects genome-wide PRDM9 binding sites and reveals the impact of prior chromatin modifications on mammalian recombination hotspot usage
Source: PubMed Central journal article supplement (PMC4562113; doi:10.1186/s13072-015-0024-6), 2015-09-07

Additional file 1:

Figure S1. Outline of the Affinity-seq method.

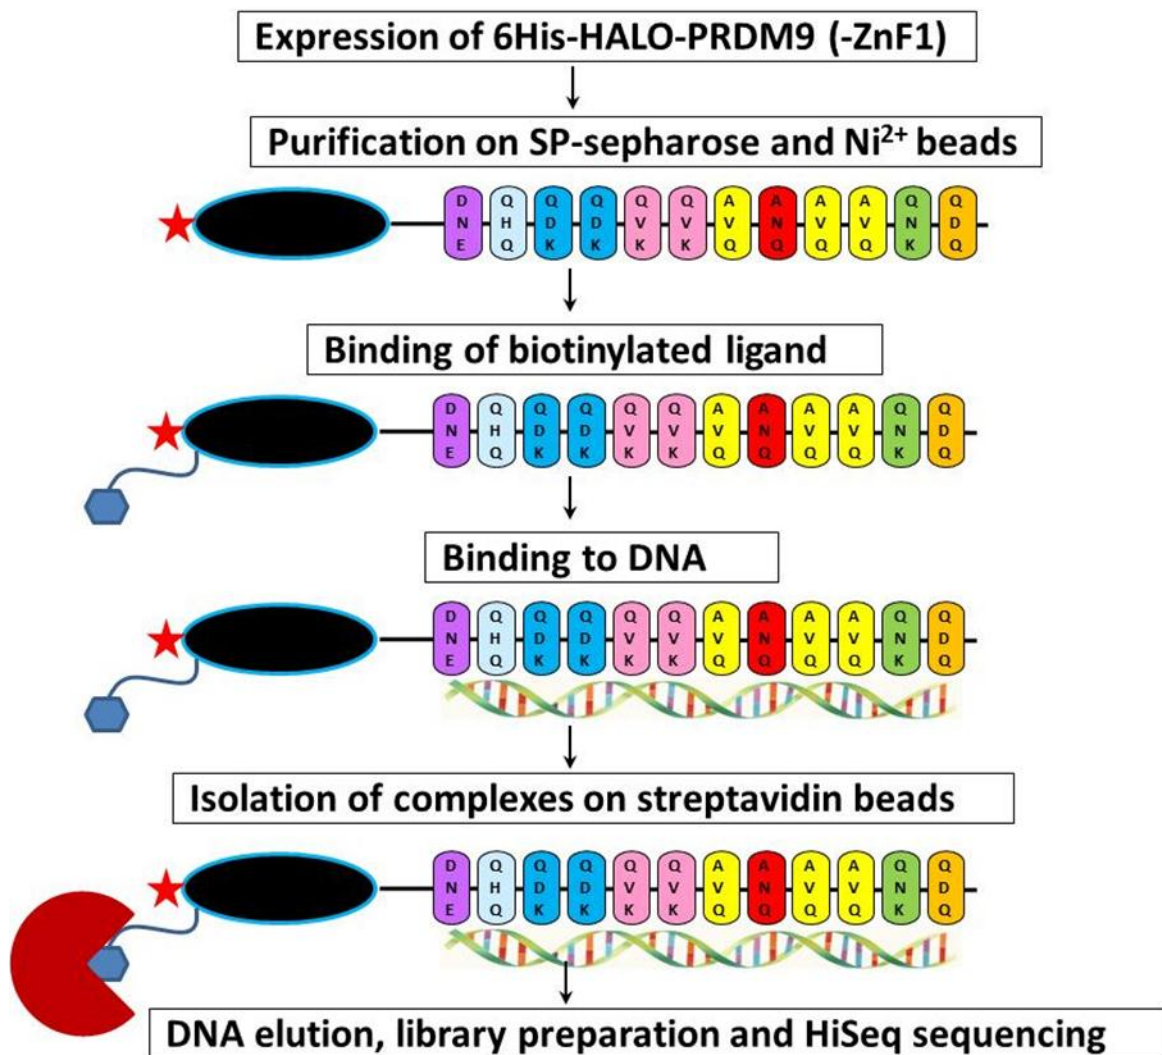

Supplement: 13072_2015_24_MOESM1_ESM.pdf [file 13072_2015_24_MOESM1_ESM.pdf]
