# Supplementary material for: Affinity-seq detects genome-wide PRDM9 binding sites and reveals the impact of prior chromatin modifications on mammalian recombination hotspot usage
Source: PubMed Central journal article supplement (PMC4562113; doi:10.1186/s13072-015-0024-6), 2015-09-07

**Additional file 3:**

**Figure S3. Comparison of Affinity-seq replicate samples.**

**A.** Venn diagram showing the overlap of Affinity-seq binding sites in two separate experiments. Replicate 2 was sequenced at greater read depth than replicate 1.

**B.** Regression line of normalized read counts for common peaks between replicates.

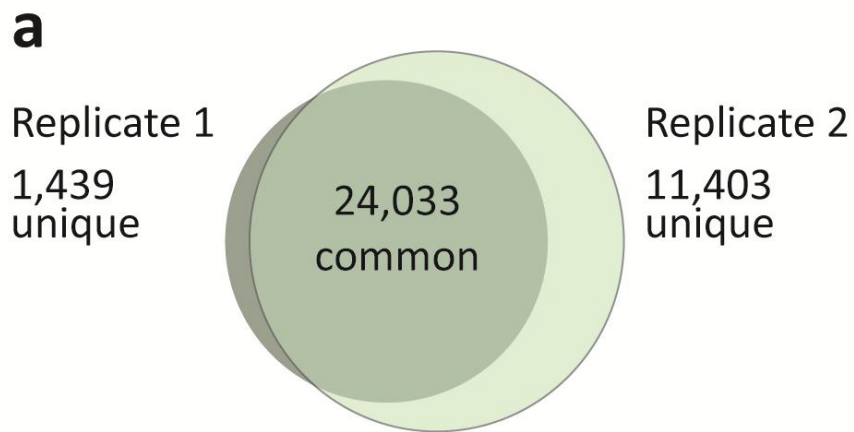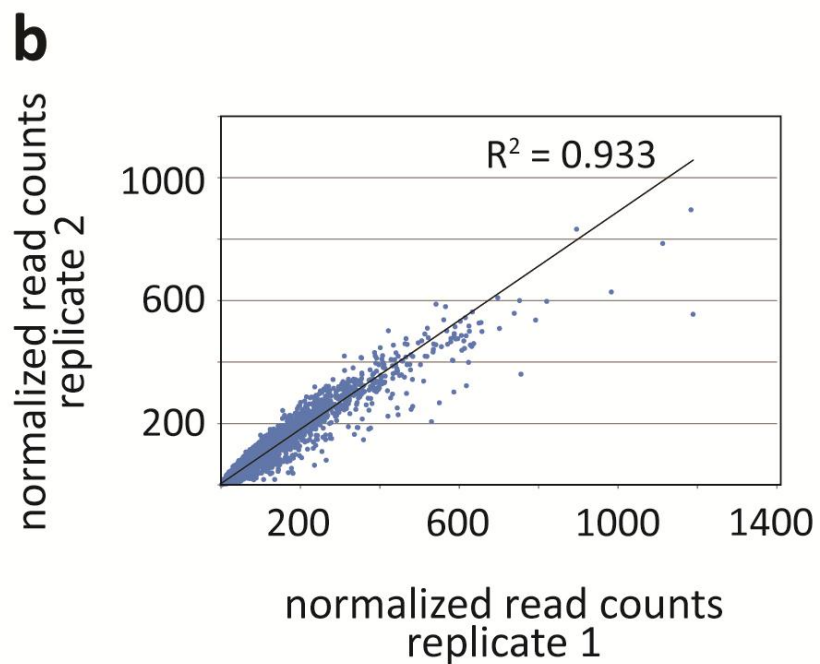

Supplement: 13072_2015_24_MOESM3_ESM.pdf [file 13072_2015_24_MOESM3_ESM.pdf]
