# Supplementary material for: Affinity-seq detects genome-wide PRDM9 binding sites and reveals the impact of prior chromatin modifications on mammalian recombination hotspot usage
Source: PubMed Central journal article supplement (PMC4562113; doi:10.1186/s13072-015-0024-6), 2015-09-07

**Additional file 8:**

**Figure S8. Comparison between LOCKs (H3K9me2) in germ cells and LADs in ES cells.** A representative region on mouse Chromosome 3 is shown. Top row, H3K9me2 in germ cells; bottom row, LADs in ES cells.

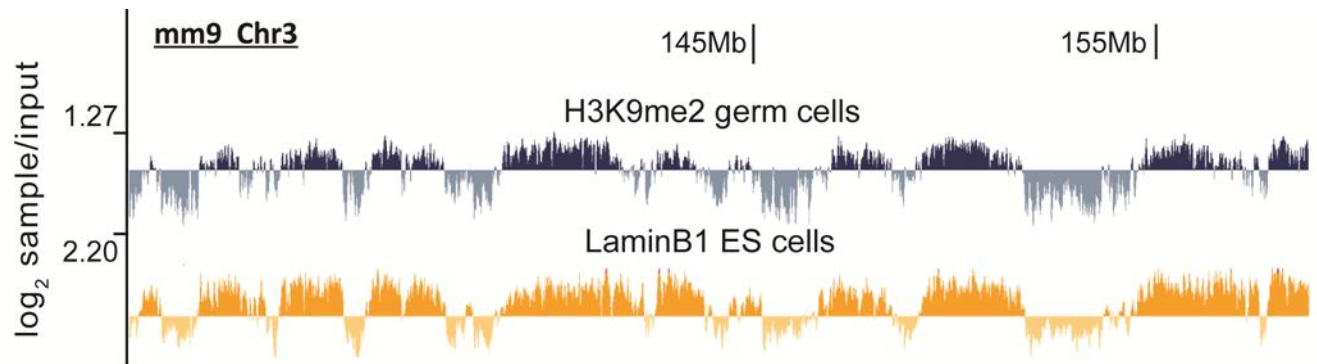

Supplement: 13072_2015_24_MOESM8_ESM.pdf [file 13072_2015_24_MOESM8_ESM.pdf]
